# Supplementary material for: New tandem Ugi/intramolecular Diels–Alder reaction based on vinylfuran and 1,3-butadienylfuran derivatives
Source: publisher site journal article supplement (doi:10.3762/bjoc.21.31), 2025-02-26

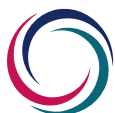

## Supporting Information

for

### **New tandem Ugi/intramolecular Diels–Alder reaction based on vinylfuran and 1,3-butadienylyfuran derivatives**

Yuriy I. Horak, Roman Z. Lytvyn, Andrii R. Vakhula, Yuriy V. Homza,  
Nazariy T. Pokhodylo and Mykola D. Obushak

*Beilstein J. Org. Chem.* **2025**, *21*, 444–450. [doi:10.3762/bjoc.21.31](https://doi.org/10.3762/bjoc.21.31)

### **Experimental procedures, compound characterizations, and NMR spectra**

## Table of contents

|                                                                                                             |     |
|-------------------------------------------------------------------------------------------------------------|-----|
| General information .....                                                                                   | S2  |
| NMR data discussion .....                                                                                   | S2  |
| General procedure for the synthesis of Ugi/intramolecular Diels–Alder reaction products <b>5a–h</b> .....   | S4  |
| Characterization data of synthesized compounds .....                                                        | S4  |
| <sup>1</sup> H NMR, <sup>13</sup> C NMR of products <b>5a–h</b> , <b>6a</b> , <b>7</b> , and <b>9</b> ..... | S10 |

## General information

Commercially available reagents and solvents were used without further purification.  $^1\text{H}$  and  $^{13}\text{C}$  NMR spectra were recorded on Varian Unity Plus 400 (400 and 101 MHz, respectively) and Bruker 170 Avance 500 (500 and 126 MHz, respectively) spectrometers in  $\text{DMSO-}d_6$  solutions using TMS as internal reference. Mass spectral analyses were performed using an Agilent 1100 series LC/MSD with API-ES/APCI mode (200 eV). The IR spectra were recorded on a Shimadzu IR Spirit-T spectrometer. Elemental analyses were accomplished using a PerkinElmer CHN Analyzer 2400 series. Melting points were determined on a Boetius melting point apparatus.

## NMR data discussion

The analysis of spectral data shows that these compounds are formed in the form of two enantiomers. This result indicates that the Ugi and Diels–Alder reactions occur in a concerted manner and the tandem process is stereoselective. In the  $^1\text{H}$  NMR spectra, proton signals are well separated, which makes it possible to assign them (Figure S1).

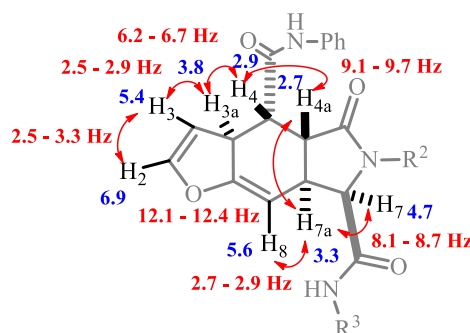

**Figure S1.** Vicinal spin coupling constants ( $^3J$ ) between protons of the furoisindole fragment, average values (red) and chemical shifts ( $\sigma$  values are given in ppm) (blue).

Figure S1 visualizes the vicinal spin–spin interactions of protons of the furoisindole core and the average values of chemical shifts for them (blue). It is convenient to start the analysis of the spectra with the weakest field doublet of aliphatic protons at 4.7 ppm, which belongs to the 7-H atom. This assignment is obvious because it is surrounded by acceptors: the nitrogen atom of the pyrrolidone ring and the carboxamide group. The value of the  $^3J$ -coupling constant for this doublet is in the range of 8.1–8.7 Hz, which indicates the cis arrangement of the 7-H and 7a-H protons. In turn, the 7a-H proton resonates at  $\approx$  3.3 ppm and is usually a doublet of doublets of doublets with three  $^3J$ -coupling constants within 12.1–12.4, 8.1–8.7, and 2.7–2.9 Hz, or a multiplet (if there is no fine spectrum structure). Judging by the values of the  $^3J$ -coupling constant, the 7a-H proton interacts not only with 7-H, but also with the proton placed in the trans position of 4a-H, and with the 8-H proton, the dihedral angle between the H–C–C–H bond planes is close to  $90^\circ$ , as a result of which the  $J$ -coupling constant

is small. The signals of 8-H and 4a-H protons are at  $\approx 5.6$  and 2.7 ppm, respectively, which is generally characteristic of vinylidene and aliphatic protons in such an environment. In turn, the 4a-H proton interacts with the 4-H proton placed in the cis-position, with a frequency of 9.1–9.7 Hz. At the same time, the spin–spin interaction constants of 4-H and 3a-H protons, despite the trans location, are within 6.2–6.7 Hz. At first glance, this result does not seem obvious, but it can be understood if a space model of such compounds is considered (Figure S2) and the dihedral angles are measured (Table S1) between the corresponding planes of H–C–C–H bonds. Continuing the analysis of spin interactions, we see that the 3a-H, 3-H, and 2-H protons interact with each other with rather small values of the  $^3J$  (2.5–3.3 Hz), which is generally characteristic of 2,3-dihydrofuran systems. It should be noted separately that in the  $^1\text{H}$  NMR spectra of the synthesized compounds, we sometimes observe long-range spin–spin interactions, which is probably due to the inflexibility of the furoindole skeleton.

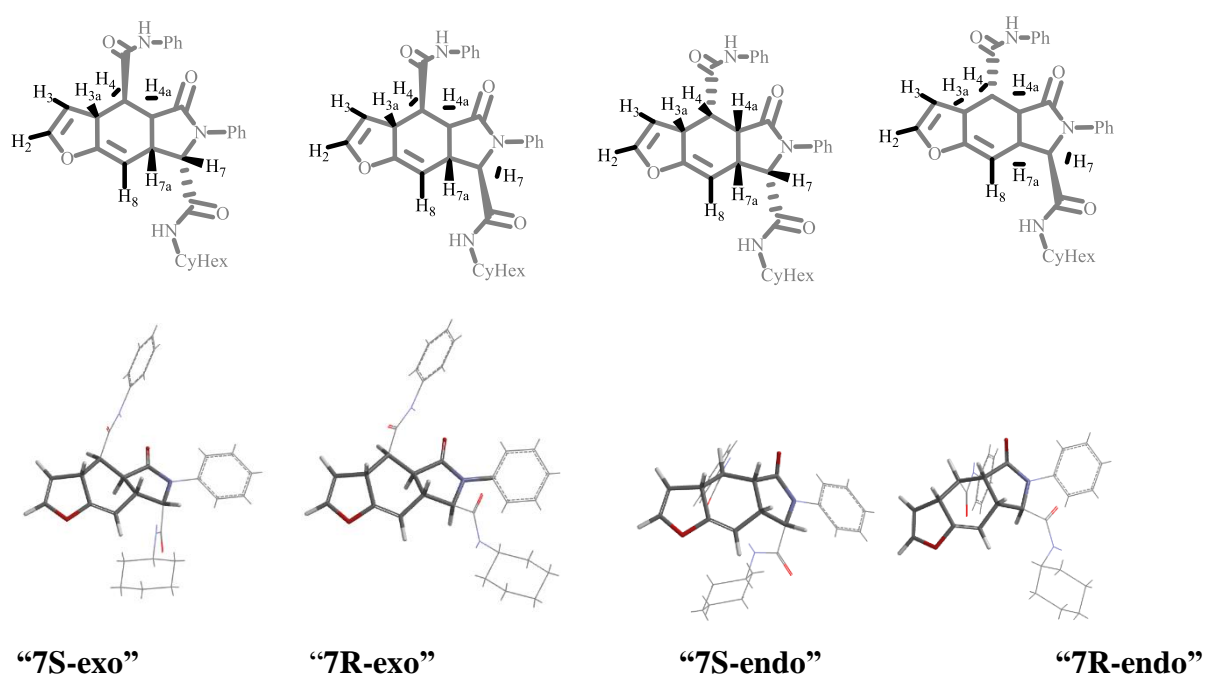

**Figure S2.** Models and structures of possible diastereomers (one enantiomer depicted for clarity), geometry optimized at the DFT/B3LYP/6.31G\* level.

**Table S1.** Selected angles for models of different diastereomers

| Dihedral angle, ° | “7S-exo” | “7R-exo” | “7S-endo” | “7R-endo” |
|-------------------|----------|----------|-----------|-----------|
| <b>H7-H7a</b>     | 35.30    | 160.39   | 2.96      | 150.80    |
| <b>H7a-H4a</b>    | 168.96   | 170.85   | 2.48      | 21.75     |
| <b>H4a-H4</b>     | 45.02    | 45.30    | 32.51     | 45.29     |
| <b>H4-H3a</b>     | 128.58   | 128.24   | 48.23     | 52.12     |

## General procedure for the synthesis of Ugi/intramolecular Diels–Alder reaction products 5a–h

To a solution of 3.3 mmol of the corresponding aldehyde **1**, **8** in 25 mL of ethanol was added 3.3 mmol of amine **2**, 3.3 mmol (0.57 g) of maleic acid monoanilide (**4**), and 3.4 mmol of isonitrile **3**, and the mixture was heated for 5–6 h. The resulting precipitate was filtered off, washed with ethanol and recrystallized from an ethanol/DMF/water mixture.

Compounds **6**, **7**, and **9** were obtained by a similar procedure.

## Characterization data of synthesized compounds

(3*aRS*,4*RS*,4*aSR*,7*SR*,7*aRS*)-*N*<sup>7</sup>-Butyl-6-(4-methoxyphenyl)-5-oxo-*N*<sup>4</sup>-phenyl-4,4*a*,5,6,7,7*a*-hexahydro-3*aH*-furo[2,3-*f*]isoindole-4,7-dicarboxamide (**5a**)

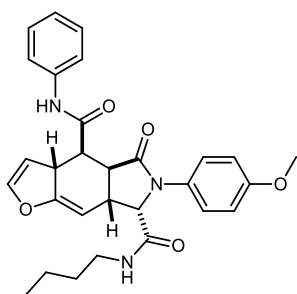

White solid, 1.34 g, 81% yield, m.p.: 255–256°C. IR (ATR, cm<sup>-1</sup>):  $\nu$  3293.1, 1697.2, 1650.1, 1600.2, 1514.6, 1443.3, 1379.1, 1259.3, 1212.2, 1182.3, 1143.8, 1071.0, 1025.4, 897.0, 822.9, 753.0, 693.1, 674.6, 594.7, 567.6, 539.1, 523.42. <sup>1</sup>H NMR (500 MHz, DMSO)  $\delta$  10.27 (s, 1H), 8.48 (t, *J* = 5.6 Hz, 1H), 7.62 (d, *J* = 8.4 Hz, 2H), 7.36 (d, *J* = 9.2 Hz, 2H), 7.30 (t, *J* = 7.6 Hz, 2H), 7.05 (t, *J* = 7.4 Hz, 1H), 6.91–6.88 (m, 3H), 5.58 (td, *J* = 2.7, 1.2 Hz, 1H), 5.36 (td, *J* = 4.0, 1.0 Hz, 1H), 4.75 (d, *J* = 8.1 Hz, 1H), 3.83 (ddq, *J* = 6.2, 4.9, 2.4 Hz, 1H), 3.74–3.70 (m, 4H), 3.17 (dq, *J* = 12.8, 6.7 Hz, 1H), 3.07 (dq, *J* = 12.8, 6.9 Hz, 1H), 2.92 (dd, *J* = 9.2, 6.8 Hz, 1H), 2.72 (dd, *J* = 12.4, 9.2 Hz, 1H), 1.43–1.39 (m, 2H), 1.31–1.26 (m, 2H), 0.87 (t, *J* = 7.3 Hz, 3H). <sup>13</sup>C NMR (126 MHz, DMSO)  $\delta$  172.19, 171.77, 168.03, 158.04, 156.03, 145.83, 139.05, 132.25, 128.60, 123.30, 122.01, 119.45, 113.83, 106.48, 95.75, 62.08, 55.21, 47.28, 45.56, 41.11, 38.27, 38.12, 31.07, 19.51, 13.55. Found, %: C 69.25; H 6.12; N 8.56. C<sub>29</sub>H<sub>31</sub>N<sub>3</sub>O<sub>5</sub>. Calculated, %: C 69.44; H 6.23; N 8.38.

(3*aRS*,4*RS*,4*aSR*,7*SR*,7*aRS*)-*N*<sup>7</sup>-Butyl-6-(4-ethoxyphenyl)-5-oxo-*N*<sup>4</sup>-phenyl-4,4*a*,5,6,7,7*a*-hexahydro-3*aH*-furo[2,3-*f*]isoindole-4,7-dicarboxamide (**5b**)

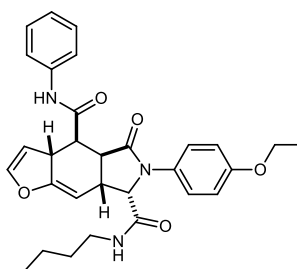

White solid, 1.28 g, 76% yield, m.p.: 267–268°C. IR (ATR, cm<sup>-1</sup>):  $\nu$  3290.2, 2930.8, 1697.1, 1677.2, 1648.7, 1600.2, 1534.6, 1513.2, 1443.3, 1391.9, 1243.6, 1210.8, 1186.6, 1138.1, 1115.3, 1071.0, 1046.8, 1022.5, 1001.2, 922.7, 897.0, 828.6, 755.8, 711.6, 694.5, 574.7, 539.1, 510.6, 480.6. <sup>1</sup>H NMR (500 MHz, DMSO)  $\delta$  10.27 (s, 1H), 8.47 (t, *J* = 5.6 Hz, 1H), 7.62 (dd, *J* = 8.6, 1.1 Hz, 2H), 7.34 (d, *J* = 9.2 Hz, 2H), 7.32–7.28 (m, 2H), 7.05 (t, *J* = 7.4 Hz, 1H), 6.91–6.85 (m, 3H), 5.58 (td, *J* = 2.7, 1.2 Hz, 1H), 5.36 (td, *J* = 3.9, 1.0 Hz, 1H), 4.75 (d, *J* = 8.1 Hz, 1H), 3.98 (q, *J* = 7.0 Hz, 2H), 3.83 (ddt, *J* = 6.6, 4.0, 2.5 Hz, 1H), 3.31–3.27 (m, 1H), 3.17 (dq, *J* = 12.8,

6.7 Hz, 1H), 3.07 (dq,  $J = 12.8, 6.9$  Hz, 1H), 2.92 (dd,  $J = 9.2, 6.8$  Hz, 1H), 2.72 (dd,  $J = 12.4, 9.2$  Hz, 1H), 1.41 (pd,  $J = 7.1, 2.2$  Hz, 2H), 1.31-1.23 (m, 5H), 0.87 (t,  $J = 7.3$  Hz, 3H).  $^{13}\text{C}$  NMR (126 MHz, DMSO)  $\delta$  172.19, 171.75, 168.04, 158.04, 155.28, 145.83, 139.06, 132.14, 128.60, 123.30, 121.97, 119.45, 114.33, 106.48, 95.75, 63.13, 62.07, 47.29, 45.56, 41.11, 38.26, 38.13, 31.07, 19.51, 14.59, 13.55. Found, %: C 69.67; H 6.21; N 8.34.  $\text{C}_{30}\text{H}_{33}\text{N}_3\text{O}_5$ . Calculated, %: C, 69.88; H, 6.45; N, 8.15.

*(3aRS,4RS,4aSR,7SR,7aRS)-N<sup>7</sup>-Butyl-6-(4-butylphenyl)-5-oxo-N<sup>4</sup>-phenyl-4,4a,5,6,7,7a-hexahydro-3aH-furo[2,3-f]isoindole-4,7-dicarboxamide (5c)*

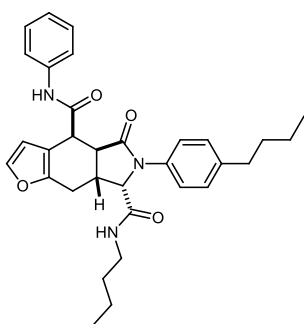

White solid, 1.42 g, 82% yield, m.p.: 204-205°C. IR (ATR,  $\text{cm}^{-1}$ ):  $\nu$  3298.8, 2928.0, 2862.4, 1708.6, 1680.1, 1655.8, 1600.2, 1543.2, 1513.2, 1500.4, 1443.3, 1377.7, 1332.1, 1270.7, 1253.6, 1230.8, 1212.3, 1185.2, 1155.2, 1105.3, 1086.8, 1034.0, 897.1, 840.0, 783.0, 753.0, 738.8, 691.7, 640.4, 554.8, 522.0, 509.1.  $^1\text{H}$  NMR (500 MHz, DMSO)  $\delta$  7.55 (d,  $J = 7.6$  Hz, 2H), 7.52 (d,  $J = 1.5$  Hz, 1H), 7.40 (d,  $J = 8.5$  Hz, 2H), 7.28 (t,  $J = 7.9$  Hz, 2H), 7.15 (d,  $J = 8.5$  Hz, 2H), 7.04 (t,  $J = 7.4$  Hz, 1H), 6.54 (d,  $J = 1.7$  Hz, 1H), 4.76 (d,  $J = 8.1$  Hz, 1H), 3.90 (d,  $J = 5.0$  Hz, 1H), 3.78-3.69 (m, 1H), 3.19-3.13 (m, 1H), 3.11-3.04 (m, 1H), 3.02 (dd,  $J = 13.2, 5.6$  Hz, 1H), 2.90 (dd,  $J = 15.3, 4.9$  Hz, 1H), 2.33-2.26 (m, 1H), 1.50 (p,  $J = 7.5$  Hz, 3H), 1.41 (dq,  $J = 13.4, 6.8$  Hz, 2H), 1.31-1.21 (m, 5H), 0.88-0.83 (m, 6H).  $^{13}\text{C}$  NMR (126 MHz, DMSO)  $\delta$  173.26, 170.02, 168.47, 150.65, 142.61, 139.08, 138.78, 137.04, 129.01, 128.81, 123.73, 120.06, 119.50, 116.77, 110.43, 63.04, 45.80, 38.47, 37.81, 35.27, 34.36, 33.35, 31.15, 25.06, 21.86, 19.73, 14.00, 13.80. Found, %: C 72.60; H 7.24; N 7.79.  $\text{C}_{32}\text{H}_{37}\text{N}_3\text{O}_4$ . Calculated, %: C 72.84; H 7.07; N 7.96.

*(3aRS,4RS,4aSR,7SR,7aRS)-N<sup>7</sup>-Cyclohexyl-6-(4-methoxyphenyl)-5-oxo-N<sup>4</sup>-phenyl-4,4a,5,6,7,7a-hexahydro-3aH-furo[2,3-f]isoindole-4,7-dicarboxamide (5d)*

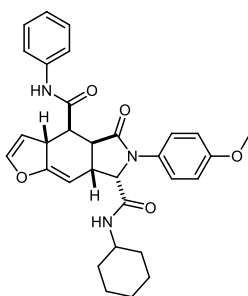

White solid, 1.36 g, 79% yield, m.p.: 270-271°C. IR (ATR,  $\text{cm}^{-1}$ ):  $\nu$  3284.6, 2936.6, 2853.8, 1694.3, 1650.1, 1598.8, 1536.0, 1514.6, 1444.7, 1255.1, 1209.4, 1185.2, 1139.5, 1071.1, 1054.0, 1026.9, 1004.0, 969.8, 945.6, 892.8, 825.8, 774.4, 755.9, 723.1, 708.8, 691.7, 660.3, 594.7, 567.6, 537.7, 524.8, 504.9, 486.3, 456.4, 429.3.  $^1\text{H}$  NMR (500 MHz, DMSO)  $\delta$  10.29 (s, 1H)\*, 8.46 (d,  $J = 7.8$  Hz, 1H)\*, 7.62-7.58 (m, 2H), 7.34-7.28 (m, 4H), 7.05 (t,  $J = 7.4$  Hz, 1H), 6.89 (d,  $J = 9.2$  Hz, 2H), 6.87 (t,  $J = 2.7$  Hz, 1H), 5.57 (td,  $J = 2.7, 1.2$  Hz, 1H), 5.39-5.35 (m, 1H), 4.70 (d,  $J = 8.1$  Hz, 1H), 3.81 (ddq,  $J = 6.3, 5.0, 2.4$  Hz, 1H), 3.70 (s, 3H), 3.60-3.54 (m, 1H), 3.28 (ddt,  $J = 12.4, 8.0, 2.9$  Hz, 1H), 2.91 (dd,  $J = 9.2, 6.8$  Hz, 1H), 2.70 (dd,  $J = 12.4, 9.2$

Hz, 1H), 1.79-1.54 (m, 5H), 1.28-1.15 (m, 5H); \* These signals are low in intensity due to hydrogen-deuterium exchange.  $^{13}\text{C}$  NMR (126 MHz, DMSO)  $\delta$  172.36, 172.07, 167.31, 158.20, 156.26, 146.01, 139.03, 132.42, 128.84, 123.62, 122.21, 119.62, 114.06, 106.64, 95.92, 62.09, 55.40, 47.92, 47.42, 45.72, 41.24, 38.38, 32.82, 32.29, 25.25, 24.55, 24.54. Found, %: C 70.42; H 6.18; N 7.71.  $\text{C}_{31}\text{H}_{33}\text{N}_3\text{O}_5$ . Calculated, %: C, 70.57; H, 6.30; N, 7.96.

*(3aRS,4RS,4aSR,7SR,7aRS)-6-(4-Chlorophenyl)-N<sup>7</sup>-cyclohexyl-5-oxo-N<sup>4</sup>-phenyl-4,4a,5,6,7,7a-hexahydro-3aH-furo[2,3-f]isoindole-4,7-dicarboxamide (5e)*

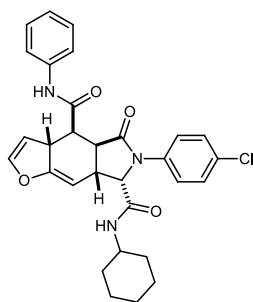

White solid, 1.29 g, 74% yield, m.p.: 325-326°C. IR (ATR,  $\text{cm}^{-1}$ ):  $\nu$  3288.8, 2853.8, 1702.9, 1675.8, 1598.8, 1551.7, 1526.0, 1497.5, 1444.7, 1419.0, 1372.0, 1286.4, 1266.5, 1246.5, 1208.0, 1142.4, 1095.3, 1069.6, 1024.0, 1001.2, 966.9, 892.8, 825.8, 761.6, 750.2, 710.2, 696.0, 677.4, 657.5, 583.3, 563.3, 540.5, 513.4, 429.2.  $^1\text{H}$  NMR (500 MHz, DMSO)  $\delta$  10.32 (s, 1H)\*, 8.55 (d,  $J = 7.8$  Hz, 1H)\*, 7.60 (dd,  $J = 8.6, 1.1$  Hz, 2H), 7.49 (d,  $J = 9.1$  Hz, 2H), 7.39 (d,  $J = 9.1$  Hz, 2H), 7.33-7.29 (m, 2H), 7.06 (t,  $J = 7.4$  Hz, 1H), 6.87 (t,  $J = 2.6$  Hz, 1H), 5.58 (td,  $J = 2.7, 1.2$  Hz, 1H), 5.42-5.37 (m, 1H), 4.82 (d,  $J = 8.1$  Hz, 1H), 3.81 (ddq,  $J = 6.4, 5.0, 2.5$  Hz, 1H), 3.57 (tt,  $J = 8.2, 3.8$  Hz, 1H), 3.29 (ddt,  $J = 11.3, 8.1, 2.9$  Hz, 1H), 2.93 (dd,  $J = 9.2, 6.8$  Hz, 1H), 2.72 (dd,  $J = 12.5, 9.2$  Hz, 1H), 1.80-1.53 (m, 5H), 1.29-1.13 (m, 5H); \* These signals are low in intensity due to hydrogen-deuterium exchange.  $^{13}\text{C}$  NMR (126 MHz, DMSO)  $\delta$  172.61, 172.26, 166.88, 158.29, 146.04, 138.98, 138.25, 128.86, 128.16, 123.68, 121.17, 119.62, 106.62, 95.72, 61.43, 47.99, 47.55, 45.75, 41.22, 38.06, 32.77, 32.25, 25.24, 24.54, 24.51. Found, %: C 67.86; H 5.44; N 7.74.  $\text{C}_{30}\text{H}_{30}\text{ClN}_3\text{O}_4$ . Calculated, %: C 67.73; H 5.68; N, 7.90.

*Ethyl 4-((3aRS,4RS,4aSR,7SR,7aRS)-7-(cyclohexylcarbamoyl)-5-oxo-4-(phenylcarbamoyl)-4a,5,7,7a-tetrahydro-3aH-furo[2,3-f]isoindol-6(4H)-yl)benzoate (5f)*

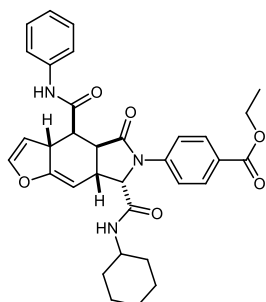

White solid, 1.51 g, 81% yield, m.p.: 303-304°C. IR (ATR,  $\text{cm}^{-1}$ ):  $\nu$  3293.1, 2935.1, 2855.3, 1705.7, 1674.4, 1644.4, 1547.4, 1516.1, 1444.7, 1426.2, 1366.3, 1277.9, 1246.5, 1230.8, 1205.1, 1189.5, 1142.4, 1113.9, 1071.1, 1025.4, 1001.2, 968.4, 894.2, 854.3, 838.6, 815.8, 767.3, 755.9, 694.6, 674.6, 581.9, 563.3, 540.5, 512.01.  $^1\text{H}$  NMR (500 MHz, DMSO)  $\delta$  10.35 (s, 1H)\*, 8.64 (d,  $J = 7.8$  Hz, 1H)\*, 7.92 (d,  $J = 9.0$  Hz, 2H), 7.65 (d,  $J = 9.0$  Hz, 2H), 7.61 (d,  $J = 7.5$  Hz, 2H), 7.33-7.29 (m, 2H), 7.07 (t,  $J = 7.4$  Hz, 1H), 6.88 (t,  $J = 2.6$  Hz, 1H), 5.59 (td,  $J = 2.7, 1.2$  Hz, 1H), 5.43-5.38 (m, 1H), 4.92 (d,  $J = 8.2$  Hz, 1H), 4.27 (q,  $J = 7.1$  Hz, 2H), 3.81 (ddq,  $J = 6.4, 5.0, 2.4$  Hz, 1H), 3.58 (td,  $J = 8.4, 7.6, 4.2$  Hz, 1H), 3.31 (ddt,  $J = 12.3, 8.0, 2.8$  Hz, 1H), 2.96 (dd,  $J = 9.1, 6.8$  Hz, 1H), 2.76 (dd,  $J = 12.6, 9.1$  Hz, 1H), 1.79-1.53 (m, 5H), 1.31-1.15

(m, 8H); \* These signals are low in intensity due to hydrogen-deuterium exchange.  $^{13}\text{C}$  NMR (126 MHz, DMSO)  $\delta$  173.38, 172.54, 167.04, 165.72, 158.65, 146.36, 143.76, 139.27, 130.54, 129.18, 125.26, 124.00, 119.92, 118.63, 106.92, 95.97, 61.49, 61.11, 48.30, 48.01, 46.07, 41.57, 38.16, 33.03, 32.54, 25.54, 24.83, 24.79, 14.63. Found, %: C 69.71; H 6.32; N 7.63.  $\text{C}_{33}\text{H}_{35}\text{N}_3\text{O}_6$ . Calculated, %: C, 69.58; H, 6.19; N, 7.38.

*(3aRS,4RS,4aSR,7SR,7aRS)-6-((5-(3-Chlorophenyl)furan-2-yl)methyl)-N<sup>7</sup>-cyclohexyl-5-oxo-N<sup>4</sup>-phenyl-4,4a,5,6,7,7a-hexahydro-3aH-furo[2,3-f]isoindole-4,7-dicarboxamide (5g)*

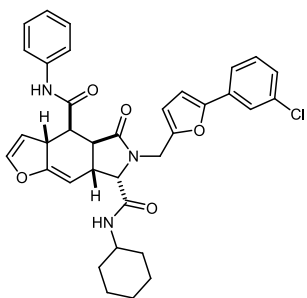

White solid, 1.60 g, 80% yield, m.p.: 292-293°C. IR (ATR,  $\text{cm}^{-1}$ ):  $\nu$  3300.2, 2929.4, 2855.3, 1697.2, 1648.7, 1600.2, 1536.0, 1498.9, 1471.8, 1443.3, 1309.3, 1246.5, 1228.0, 1138.1, 1062.5, 1026.9, 891.4, 793.0, 753.0, 717.4, 691.7, 567.6, 539.1, 502.0, 449.2, 417.9.  $^1\text{H}$  NMR (500 MHz, DMSO)  $\delta$  7.84 (dd,  $J = 7.9, 1.7$  Hz, 1H), 7.61 (dd,  $J = 8.6, 1.1$  Hz, 2H), 7.53 (dd,  $J = 8.0, 1.2$  Hz, 1H), 7.41 (td,  $J = 7.6, 1.3$  Hz, 1H), 7.35-7.29 (m, 5H), 7.07-7.04 (m, 2H), 6.84 (t,  $J = 2.7$  Hz, 1H), 6.46 (d,  $J = 3.4$  Hz, 1H), 5.54 (td,  $J = 2.7, 1.2$  Hz, 1H), 5.29 (td,  $J = 3.8, 1.1$  Hz, 1H), 4.62 (d,  $J = 15.8$  Hz, 1H), 4.20 (d,  $J = 8.1$  Hz, 1H), 4.05 (d,  $J = 15.7$  Hz, 1H), 3.79-3.75 (m, 1H), 3.15-3.08 (m, 1H), 2.89-2.83 (m, 1H), 1.75-1.51 (m, 5H), 1.21-1.09 (m, 5H). Found, %: C 68.81; H 5.46; N 6.69.  $\text{C}_{35}\text{H}_{34}\text{ClN}_3\text{O}_5$ . Calculated, %: C 68.68; H 5.60; N 6.86.

*(3aRS,4RS,4aSR,7SR,7aRS)-6-((5-(4-Chlorophenyl)furan-2-yl)methyl)-N<sup>7</sup>-cyclohexyl-5-oxo-N<sup>4</sup>-phenyl-4,4a,5,6,7,7a-hexahydro-3aH-furo[2,3-f]isoindole-4,7-dicarboxamide (5h)*

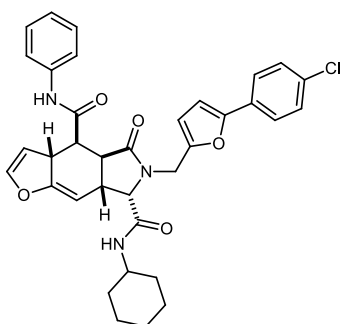

White solid, 1.44 g, 72% yield, m.p.: 268-269°C. IR (ATR, KBr,  $\text{cm}^{-1}$ ):  $\nu$  3297.4, 2925.1, 2853.8, 1685.7, 1655.8, 1597.3, 1534.6, 1500.3, 1483.2, 1441.9, 1407.6, 1369.1, 1352.0, 1296.4, 1272.1, 1249.3, 1225.1, 1173.8, 1159.5, 1138.1, 1123.8, 1098.1, 1059.7, 1038.3, 1022.6, 1008.3, 998.3, 969.8, 954.1, 929.9, 902.8, 889.9, 872.8, 858.6, 832.9, 822.9, 804.4, 790.1, 767.3, 750.2, 730.2, 688.8, 670.3, 616.1, 596.1, 567.6, 556.2, 541.9, 499.1, 426.44.  $^1\text{H}$  NMR (500 MHz, DMSO)  $\delta$  10.25 (s, 1H), 8.20 (d,  $J = 7.8$  Hz, 1H), 7.70 (d,  $J = 8.7$  Hz, 2H), 7.63 (d,  $J = 7.5$  Hz, 2H), 7.46 (d,  $J = 8.7$  Hz, 2H), 7.33-7.29 (m, 2H), 7.06 (t,  $J = 7.4$  Hz, 1H), 6.94 (d,  $J = 3.3$  Hz, 1H), 6.86 (t,  $J = 2.6$  Hz, 1H), 6.40 (d,  $J = 3.3$  Hz, 1H), 5.55 (td,  $J = 2.8, 1.2$  Hz, 1H), 5.30 (td,  $J = 3.8, 1.0$  Hz, 1H), 4.64 (d,  $J = 15.8$  Hz, 1H), 4.20 (d,  $J = 8.0$  Hz, 1H), 3.99 (d,  $J = 15.8$  Hz, 1H), 3.79 (ddq,  $J = 6.3, 5.0, 2.4$  Hz, 1H), 3.56-3.48 (m, 1H), 3.11 (ddt,  $J = 11.9, 8.6, 2.9$  Hz, 1H), 2.86 (dd,  $J = 9.3, 6.8$  Hz, 1H), 2.51-2.47 (1H, m)\*, 1.75-1.51 (m, 5H), 1.26-1.11 (m, 5H); \*Signal is overlapped with DMSO.  $^{13}\text{C}$  NMR (126 MHz, DMSO)  $\delta$  172.39, 172.11, 166.64, 157.75, 151.76, 150.02, 145.78, 139.07, 131.73, 129.09, 128.78, 128.58, 125.12, 123.31,



119.47, 110.99, 107.32, 106.45, 95.96, 59.70, 48.69, 47.74, 46.22, 45.47, 40.08, 38.75, 38.51, 32.69, 32.22, 25.10, 24.41. Found, %: C 68.87; H 5.41; N 6.65. C<sub>35</sub>H<sub>34</sub>ClN<sub>3</sub>O<sub>5</sub>. Calculated, %: C 68.68; H 5.60; N 6.86.

*(4SR,4aSR,7SR,7aRS)-7-(Cyclohexylcarbamoyl)-5-oxo-6-(p-tolyl)-4a,5,6,7,7a,8-hexahydro-4H-furo[2,3-f]isoindole-4-carboxylic acid (6a)*

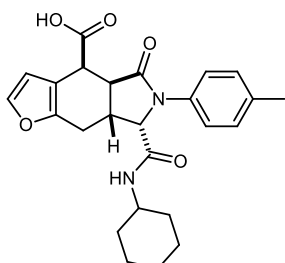

White solid, 1.07 g, 75% yield, m.p.: 267-268°C. IR (ATR, cm<sup>-1</sup>):  $\nu$  3264.6, 2929.4, 2855.3, 1690.1, 1640.1, 1556.0, 1516.1, 1447.6, 1382.0, 1334.9, 1293.6, 1267.9, 1247.9, 1212.3, 1152.4, 1132.4, 1103.9, 1088.2, 942.7, 892.8, 807.2, 734.5, 668.9, 604.7, 510.6, 480.6. <sup>1</sup>H NMR (500 MHz, DMSO)  $\delta$  7.52 (d, *J* = 1.7 Hz, 1H), 7.40 (d, *J* = 8.5 Hz, 2H), 7.16 (d, *J* = 8.2 Hz, 2H), 6.43 (d, *J* = 2.0 Hz, 1H), 4.70 (d, *J* = 8.1 Hz, 1H), 3.77-3.74 (m, 1H), 3.60-3.53 (m, 1H)\*, 3.33 (tdd, *J* = 13.2, 8.1, 5.1 Hz, 1H), 2.93 (dd, *J* = 13.2, 5.4 Hz, 1H), 2.86 (dd, *J* = 15.4, 5.0 Hz, 1H), 2.53-2.50 (m, 1H)\*\*, 2.35-2.28 (m, 1H), 2.26 (s, 3H), 1.80-1.65 (m, 4H), 1.54 (d, *J* = 12.4 Hz, 1H), 1.31-1.14 (m, 5H); \*Overlapped with water signal; \*\*Overlapped with DMSO signal. <sup>13</sup>C NMR (126 MHz, DMSO)  $\delta$  172.99, 172.61, 167.35, 150.31, 142.52, 136.95, 133.61, 129.36, 119.82, 116.10, 110.81, 62.68, 47.86, 45.18, 36.91, 34.92, 32.62, 32.29, 25.27, 25.03, 24.49, 20.53. Found, %: C 68.49; H 6.32; N 6.57. C<sub>25</sub>H<sub>28</sub>N<sub>2</sub>O<sub>5</sub>. Calculated, %: C 68.79; H 6.47; N 6.42.

*(3aSR,4SR,4aSR,7SR,7aSR)-N<sup>7</sup>-Cyclohexyl-6-(4-methoxyphenyl)-5-oxo-N<sup>4</sup>-phenyl-4,4a,5,6,7,7a-hexahydro-3aH-thieno[2,3-f]isoindole-4,7-dicarboxamide (7)*

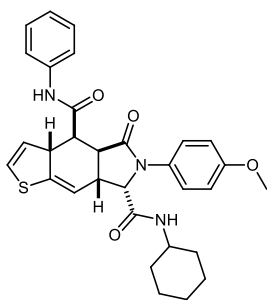

White solid, 1.41 g, 79% yield, m.p.: 307-308°C. IR (ATR, cm<sup>-1</sup>):  $\nu$  3284.6, 2932.3, 2853.8, 1694.3, 1648.7, 1600.2, 1513.2, 1443.3, 1374.9, 1302.1, 1247.9, 1210.8, 1182.3, 1082.5, 1026.9, 891.4, 822.9, 805.8, 751.6, 690.3, 667.5, 583.3, 561.9, 523.4, 490.6, 419.3. <sup>1</sup>H NMR (500 MHz, DMSO)  $\delta$  10.36 (s, 1H), 8.47 (d, *J* = 7.9 Hz, 1H), 7.61 (d, *J* = 7.6 Hz, 2H), 7.34 (d, *J* = 9.2 Hz, 2H), 7.33-7.29 (m, 2H), 7.07 (t, *J* = 7.4 Hz, 1H), 6.90 (d, *J* = 9.2 Hz, 2H), 6.84 (d, *J* = 5.9 Hz, 1H), 6.29 (d, *J* = 6.0 Hz, 1H), 6.15 (t, *J* = 3.8 Hz, 1H), 4.75-4.67 (m, 2H), 3.71 (s, 3H), 3.61-3.54 (m, 1H), 3.39-3.34 (m, 1H), 3.23 (dd, *J* = 9.3, 6.7 Hz, 1H), 2.84 (dd, *J* = 13.0, 9.3 Hz, 1H), 1.83-1.53 (m, 5H), 1.32-1.14 (m, 5H). Found, %: C 68.61; H 6.32; N 7.56. C<sub>31</sub>H<sub>33</sub>N<sub>3</sub>O<sub>4</sub>S. Calculated, %: C 68.48; H 6.12; N 7.73.

(1*SR*,3*aSR*,4*RS*,5*SR*,7*aRS*)-*N*<sup>1</sup>-Cyclohexyl-5-(furan-2-yl)-3-oxo-*N*<sup>4</sup>-phenyl-2-(*p*-tolyl)-2,3,3*a*,4,5,7*a*-hexahydro-1*H*-isoindole-1,4-dicarboxamide (**9a**)

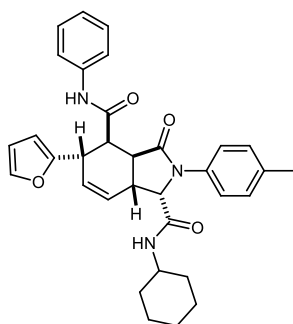

White solid, 1.29 g, 73% yield, m.p.: 283-284°C. IR (ATR, cm<sup>-1</sup>):  $\nu$  3305.9, 2933.7, 2853.8, 1697.1, 1658.7, 1645.8, 1600.2, 1540.3, 1516.1, 1501.8, 1444.7, 1390.6, 1354.9, 1312.1, 1267.9, 1247.9, 1190.9, 1101.0, 1073.9, 1015.5, 938.4, 891.4, 867.1, 830.1, 800.1, 790.1, 751.6, 728.8, 690.3, 600.4, 556.2, 513.4, 493.4. <sup>1</sup>H NMR (500 MHz, DMSO)  $\delta$  9.78 (s, 1H)\*, 8.39 (d,  $J$  = 7.8 Hz, 1H)\*, 7.63 (dd,  $J$  = 1.8, 0.8 Hz, 1H), 7.56 (dd,  $J$  = 8.6, 1.1 Hz, 2H), 7.33 (d,  $J$  = 8.6 Hz, 2H), 7.30-7.26 (m, 2H), 7.13 (d,  $J$  = 8.3 Hz, 2H), 7.04 (t,  $J$  = 7.4 Hz, 1H), 6.42 (dd,  $J$  = 3.1, 1.9 Hz, 1H), 6.11 (dt,  $J$  = 10.0, 1.9 Hz, 1H), 6.03 (d,  $J$  = 3.2 Hz, 1H), 5.80 (dt,  $J$  = 9.9, 3.3 Hz, 1H), 4.72 (d,  $J$  = 7.9 Hz, 1H), 3.90-3.85 (m, 1H), 3.58-3.52 (m, 1H), 3.39 (dtd,  $J$  = 12.5, 4.6, 2.1 Hz, 1H), 3.34 (d,  $J$  = 4.3 Hz, 1H), 3.12 (dd,  $J$  = 13.4, 4.2 Hz, 1H), 2.23 (s, 3H), 1.78-1.65 (m, 4H), 1.54 (d,  $J$  = 12.4 Hz, 1H), 1.30-1.14 (m, 5H); \*these signals are low in intensity due to hydrogen-deuterium exchange. <sup>13</sup>C NMR (126 MHz, DMSO)  $\delta$  173.29, 170.21, 166.64, 155.94, 142.56, 138.71, 136.73, 133.82, 129.39, 128.90, 128.63, 126.00, 123.72, 119.99, 119.46, 110.71, 106.85, 62.21, 47.92, 42.94, 42.29, 37.78, 36.49, 32.65, 32.20, 25.31, 24.54, 24.52, 20.51. Found, %: C 73.59; H 6.30; N 7.63. C<sub>33</sub>H<sub>35</sub>N<sub>3</sub>O<sub>4</sub>. Calculated, %: C 73.72; H 6.56; N 7.82.

(1*SR*,3*aSR*,4*RS*,5*SR*,7*aRS*)-*N*<sup>1</sup>-Cyclohexyl-5-(furan-2-yl)-2-(4-methoxyphenyl)-3-oxo-*N*<sup>4</sup>-phenyl-2,3,3*a*,4,5,7*a*-hexahydro-1*H*-isoindole-1,4-dicarboxamide (**9b**)

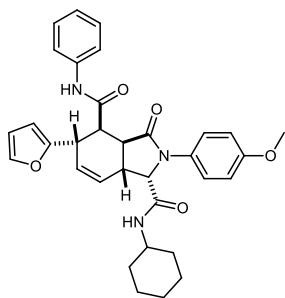

White solid, 1.28 g, 70% yield, m.p.: 282-283°C. <sup>1</sup>H NMR (500 MHz, DMSO)  $\delta$  9.75 (s, 1H)\*, 8.35 (d,  $J$  = 7.8 Hz, 1H)\*, 7.65-7.61 (m, 1H), 7.57-7.54 (m, 2H), 7.32 (d,  $J$  = 9.1 Hz, 2H), 7.30-7.26 (m, 2H), 7.04 (t,  $J$  = 7.4 Hz, 1H), 6.89 (d,  $J$  = 9.2 Hz, 2H), 6.42 (dd,  $J$  = 3.1, 1.9 Hz, 1H), 6.10 (d,  $J$  = 9.9 Hz, 1H), 6.03 (d,  $J$  = 3.2 Hz, 1H), 5.80 (dt,  $J$  = 9.9, 3.3 Hz, 1H), 4.67 (d,  $J$  = 7.9 Hz, 1H), 3.91-3.86 (m, 1H), 3.70 (s, 3H), 3.61-3.52 (m, 1H), 3.39 (dtd,  $J$  = 12.6, 4.7, 2.1 Hz, 1H), 3.34 (d,  $J$  = 4.3 Hz, 1H), 3.11 (dd,  $J$  = 13.4, 4.2 Hz, 1H), 1.78-1.65 (m, 4H), 1.54 (d,  $J$  = 12.2 Hz, 1H), 1.30-1.13 (m, 5H); \* These signals are low in intensity due to hydrogen-deuterium exchange; <sup>13</sup>C NMR (126 MHz, DMSO)  $\delta$  173.15, 170.20, 166.68, 156.42, 155.95, 142.56, 138.71, 132.17, 128.91, 128.59, 126.06, 123.71, 122.36, 119.45, 114.16, 110.70, 106.86, 62.71, 55.41, 47.93, 42.98, 42.11, 37.73, 36.67, 32.67, 32.19, 25.30, 24.56, 24.53. IR (ATR, KBr, cm<sup>-1</sup>):  $\nu$  3301.7, 2933.7, 2851.0, 1691.5, 1647.3, 1600.2, 1537.5, 1514.6, 1444.7, 1389.1, 1372.0, 1356.3, 1285.0, 1256.5, 1216.6, 1202.3, 1183.8, 1150.9, 1101.0, 1085.3, 1073.9, 1029.7, 1015.5, 938.4, 867.1, 824.3, 787.3, 750.2, 724.5, 693.1, 670.3, 596.1, 564.8, 517.7, 493.5. Found, %: C 71.32; H 6.53; N 7.42. C<sub>33</sub>H<sub>35</sub>N<sub>3</sub>O<sub>5</sub>. Calculated, %: C 71.59; H 6.37; N 7.59.

# <sup>1</sup>H NMR and <sup>13</sup>C NMR spectra of products 5a–h, 6a, 7, and 9

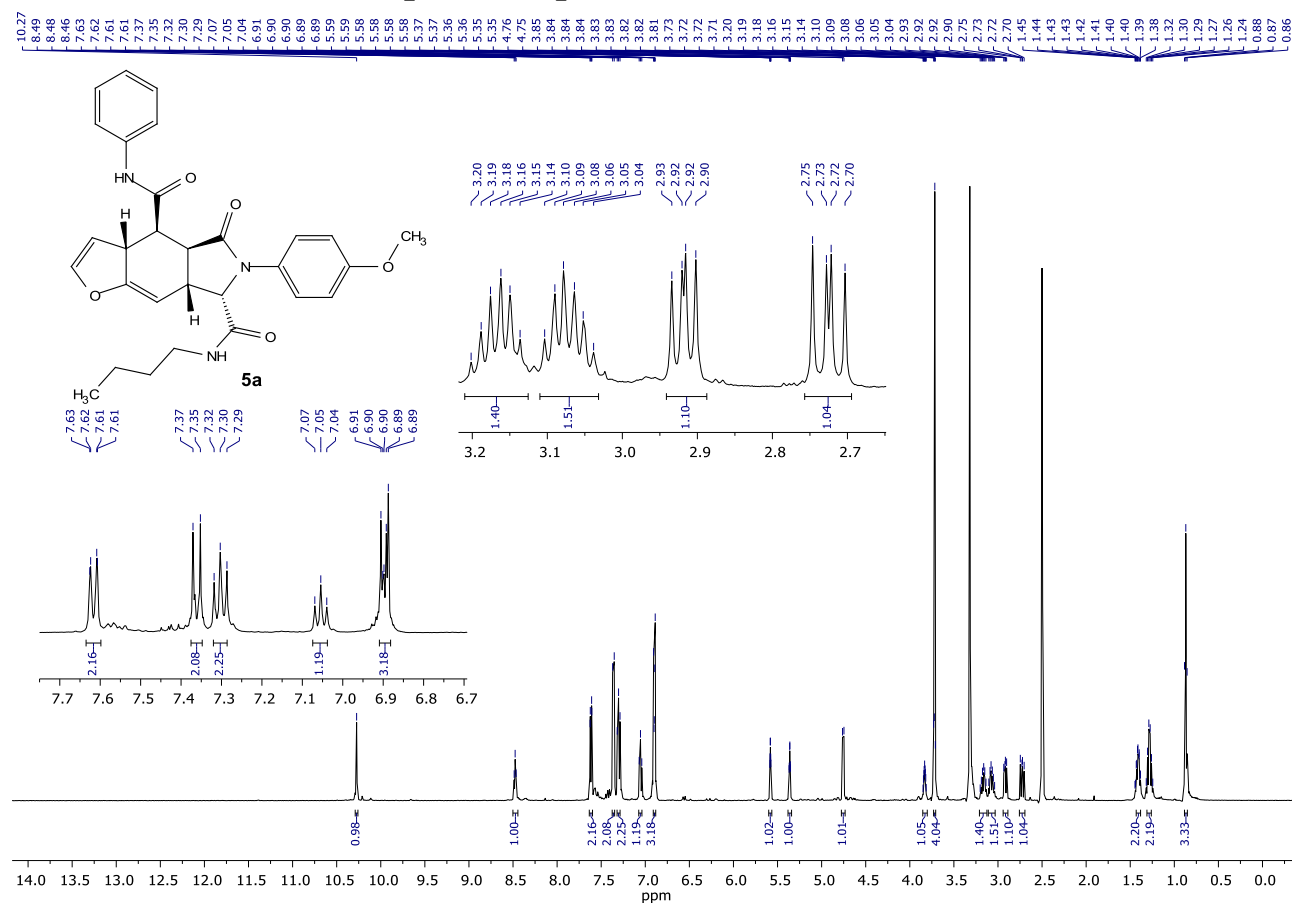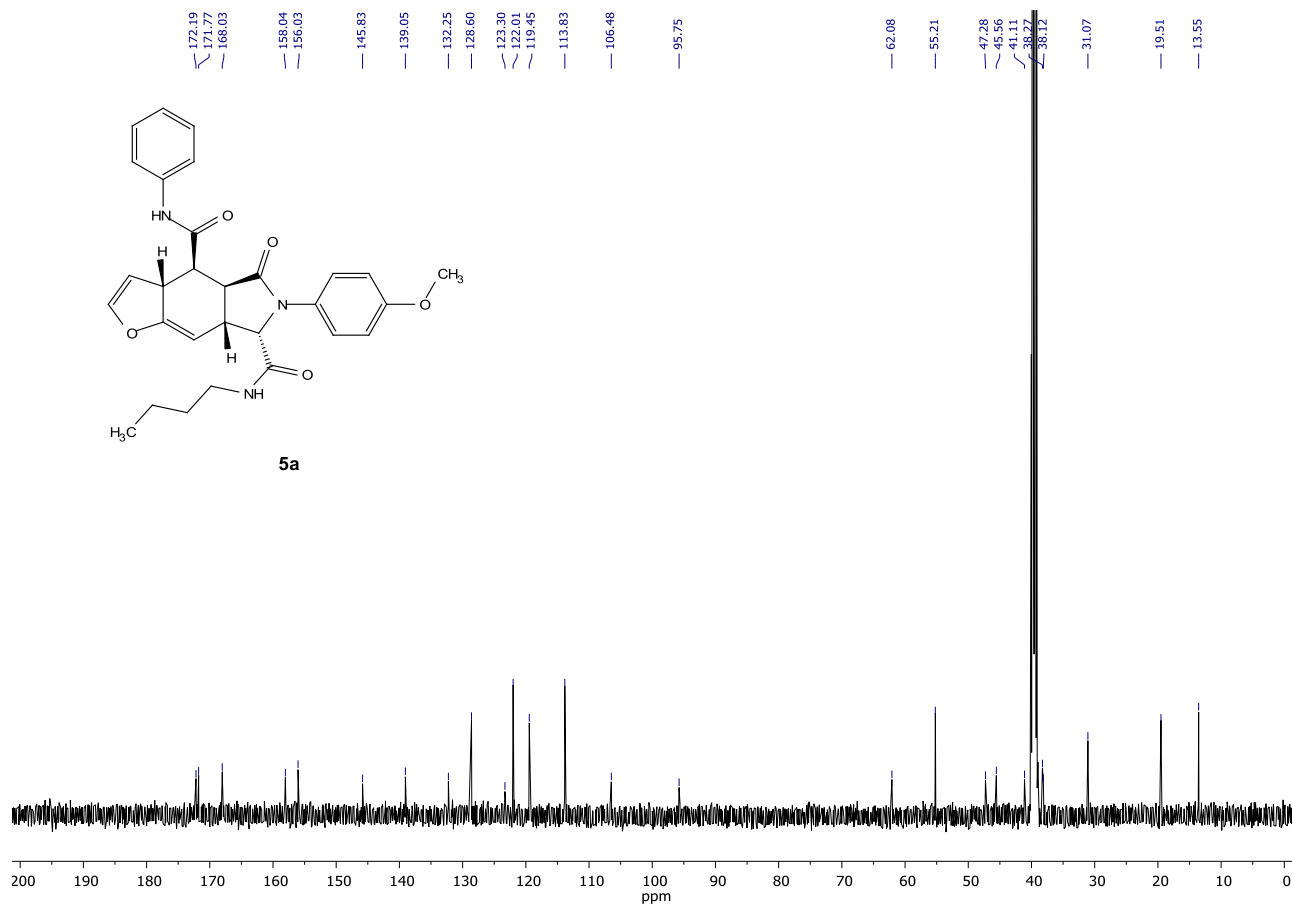

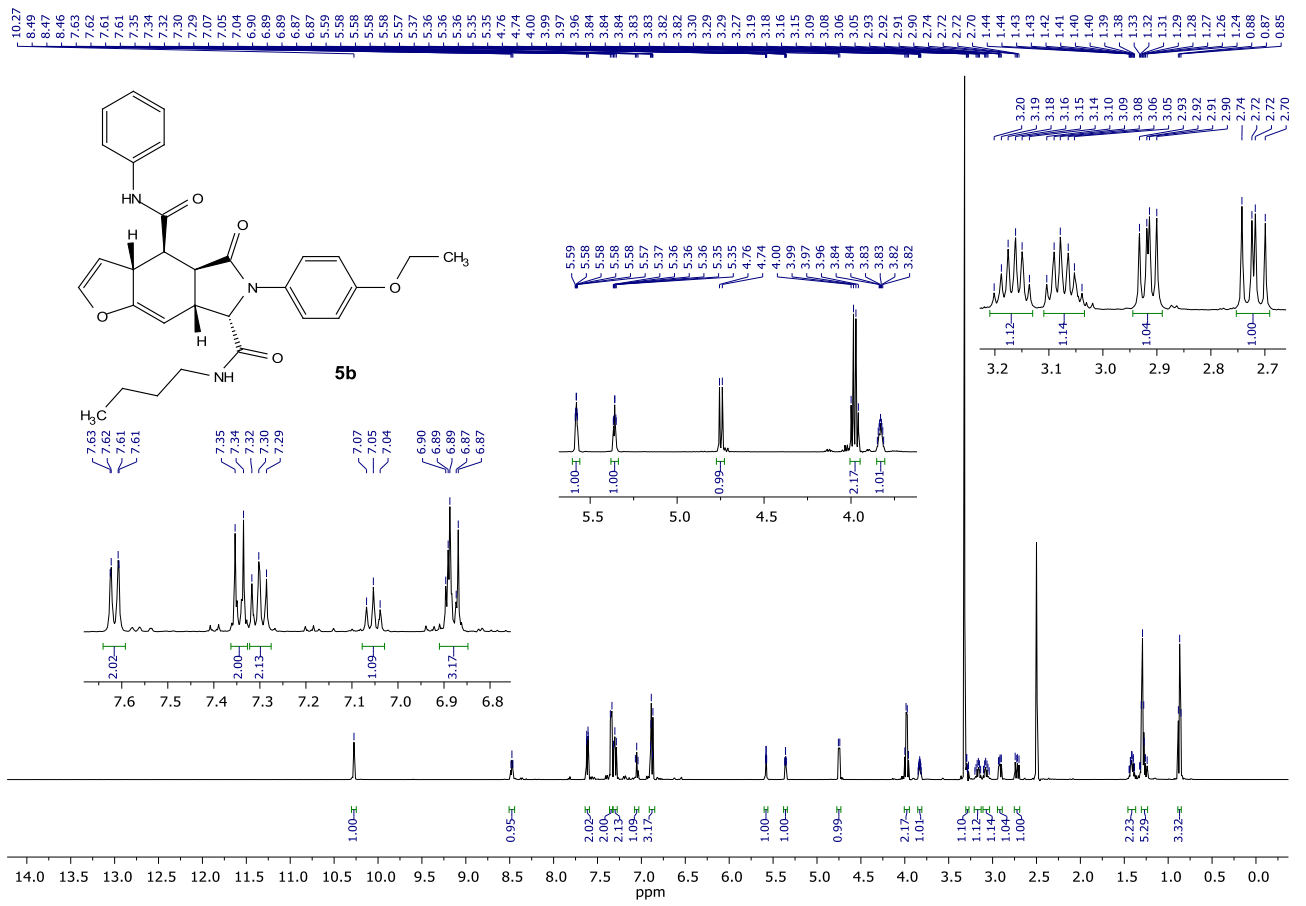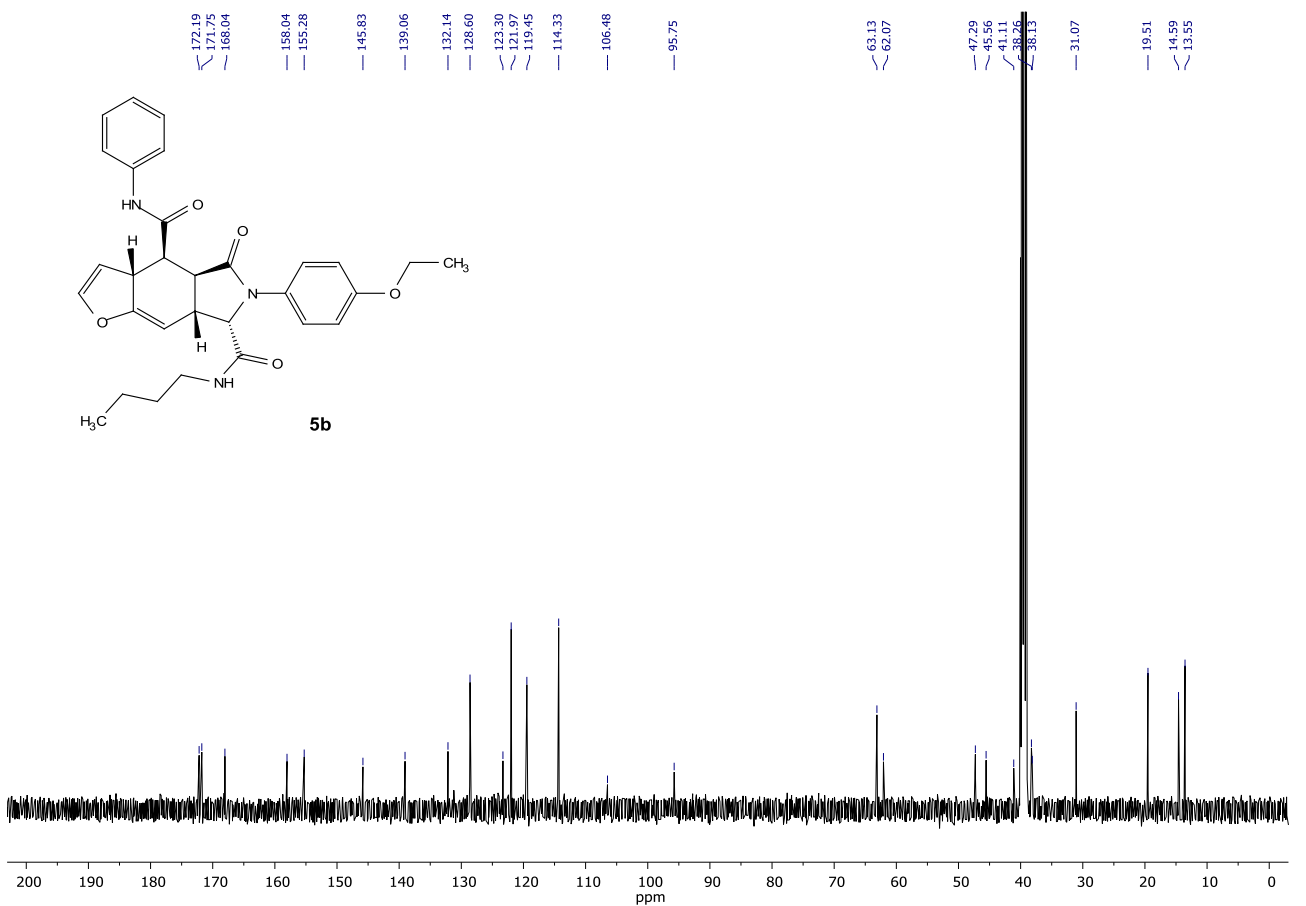

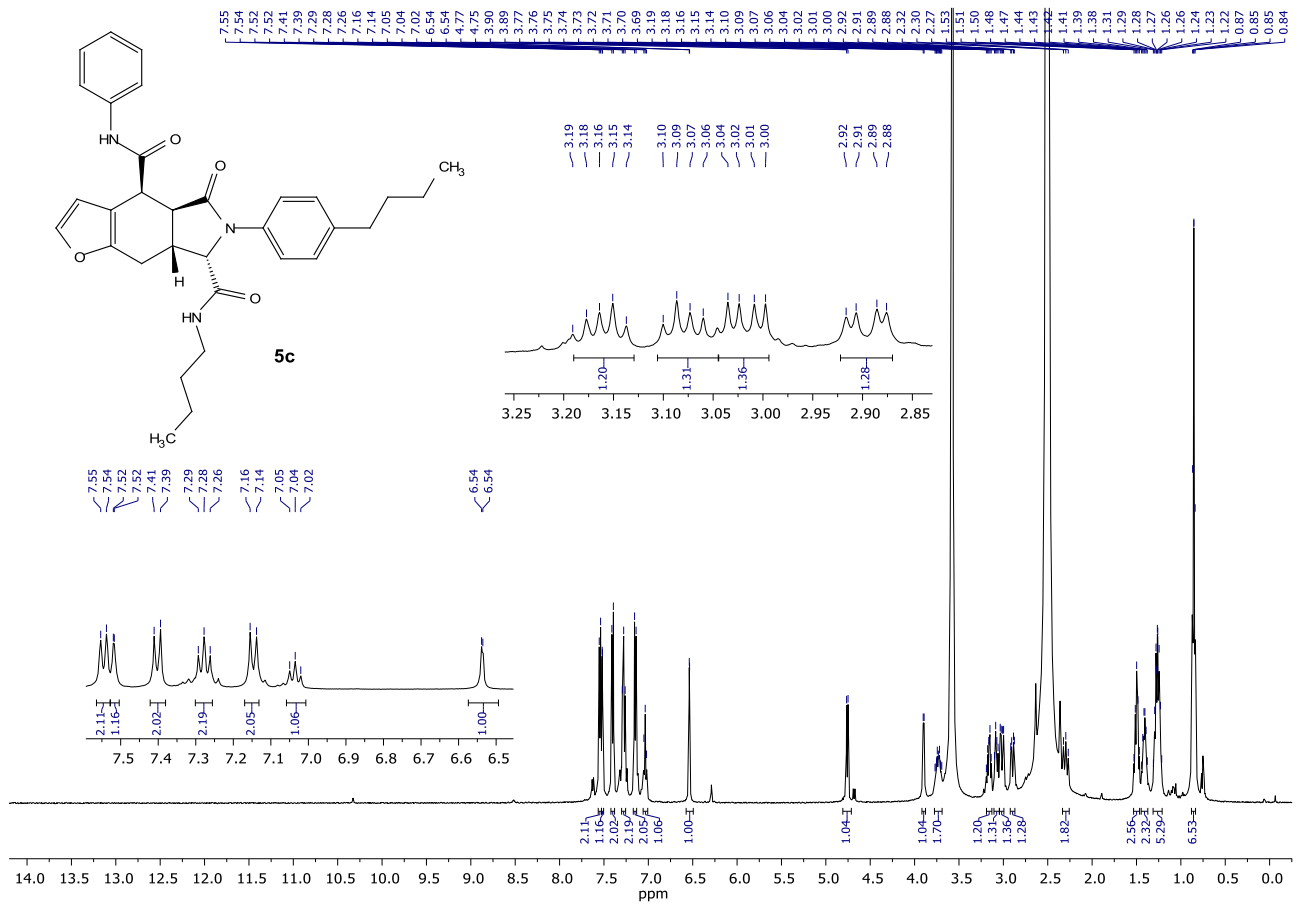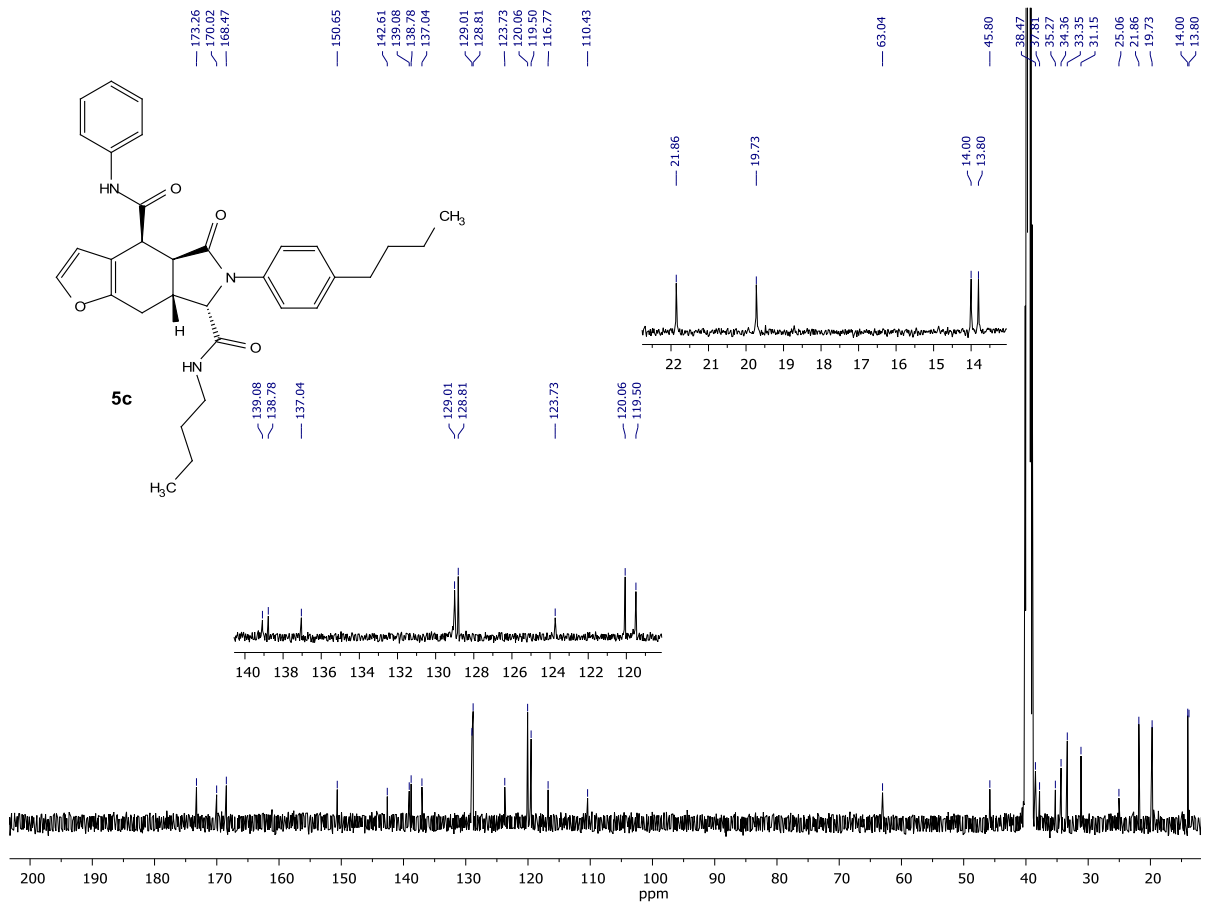

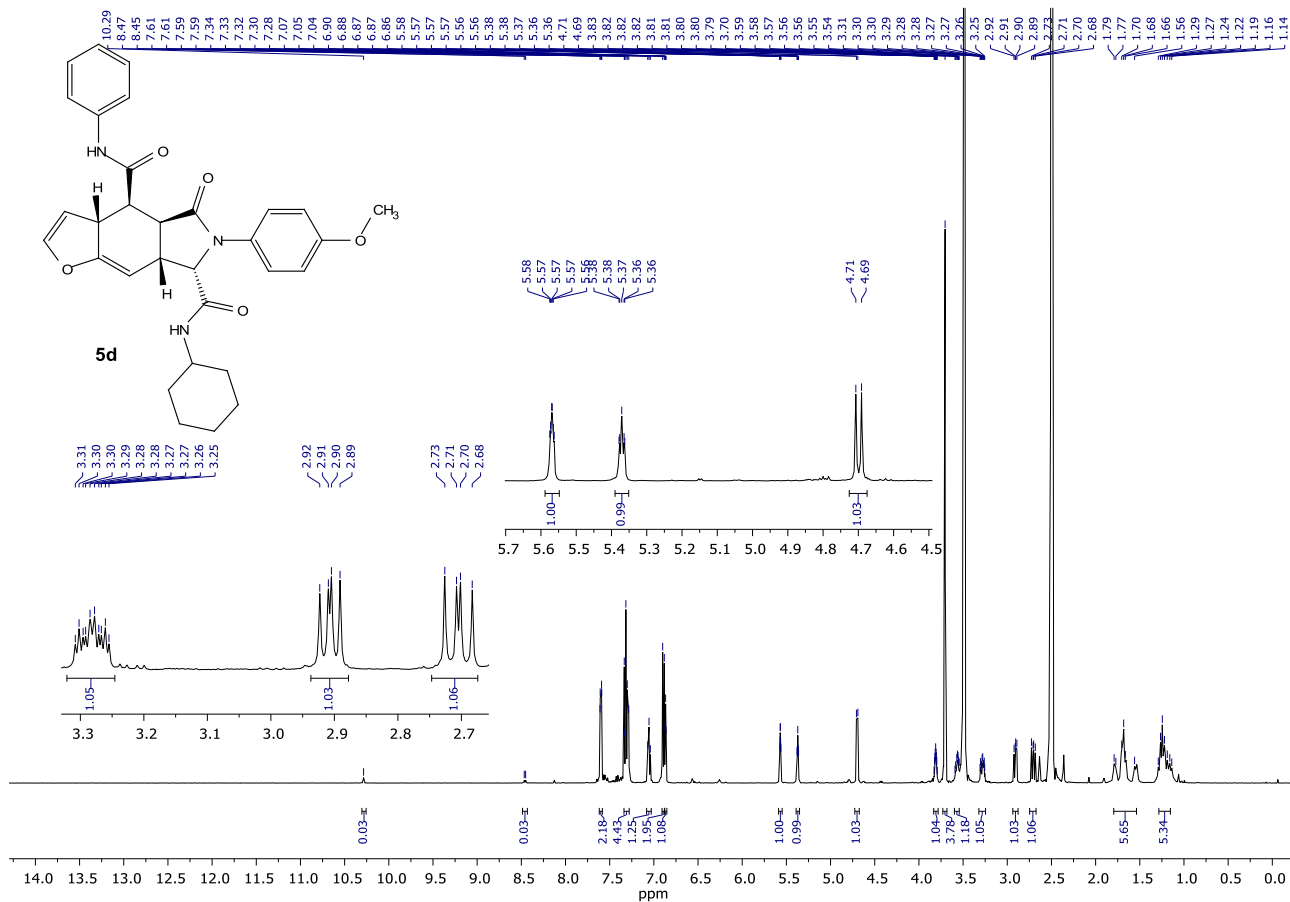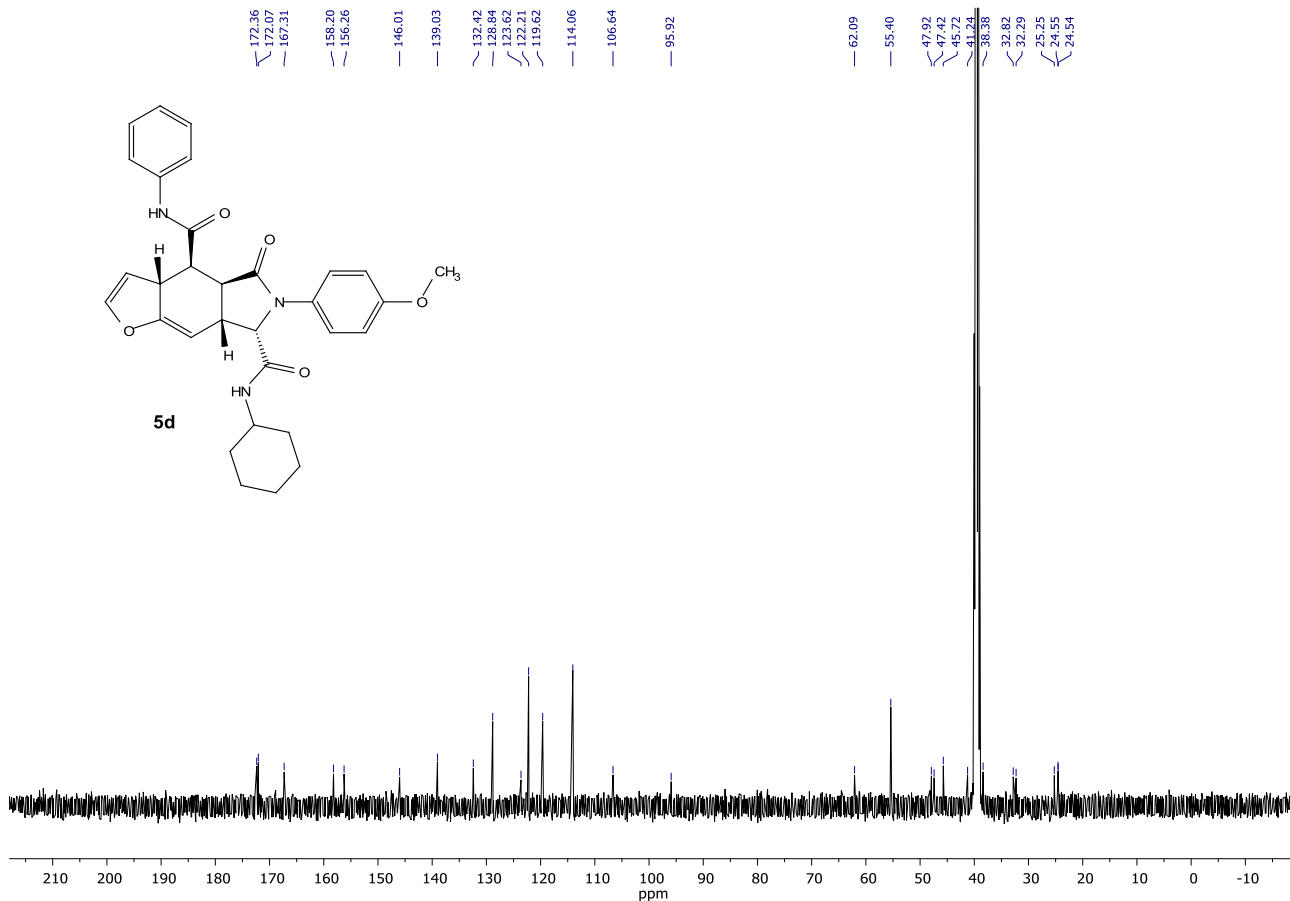



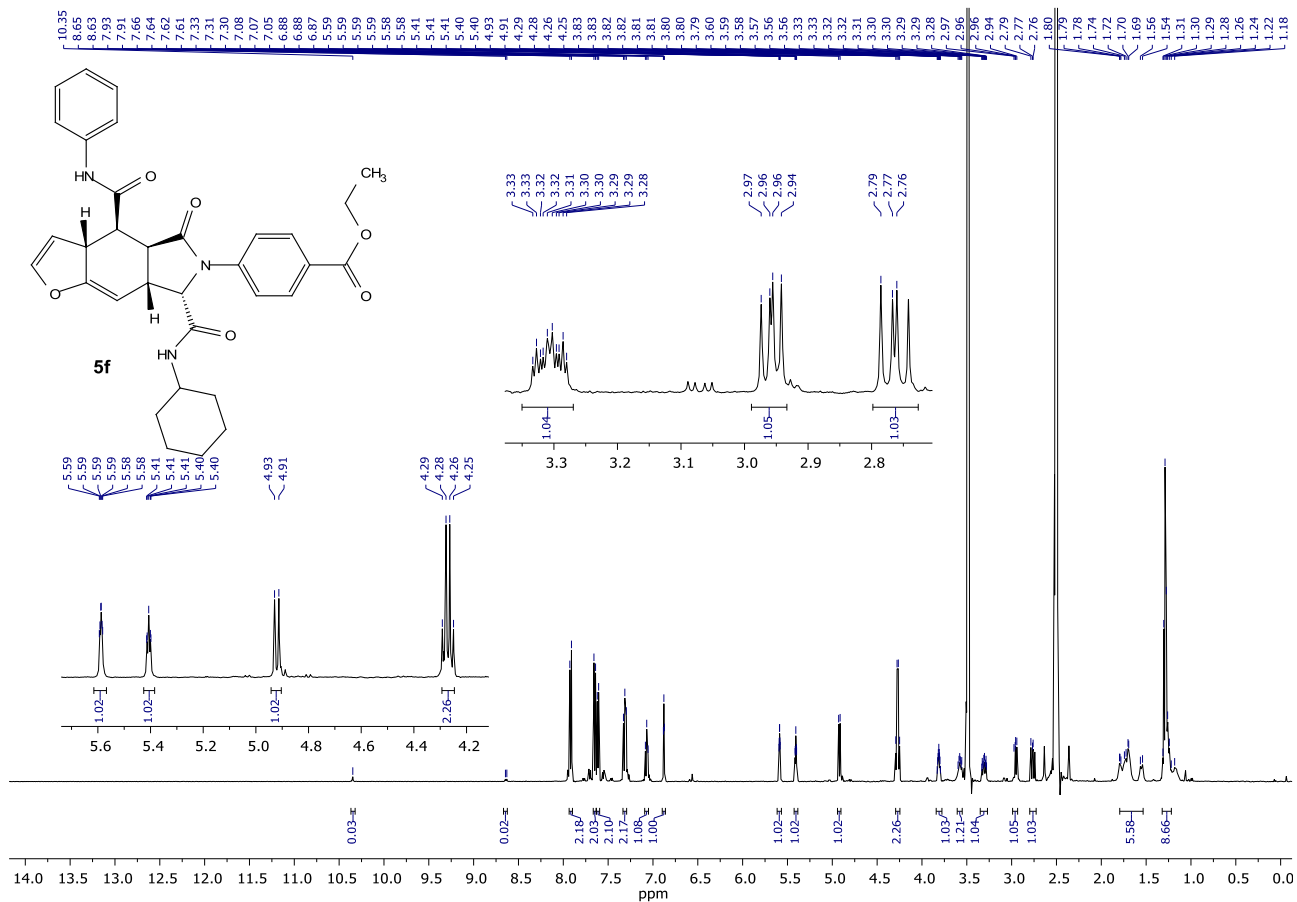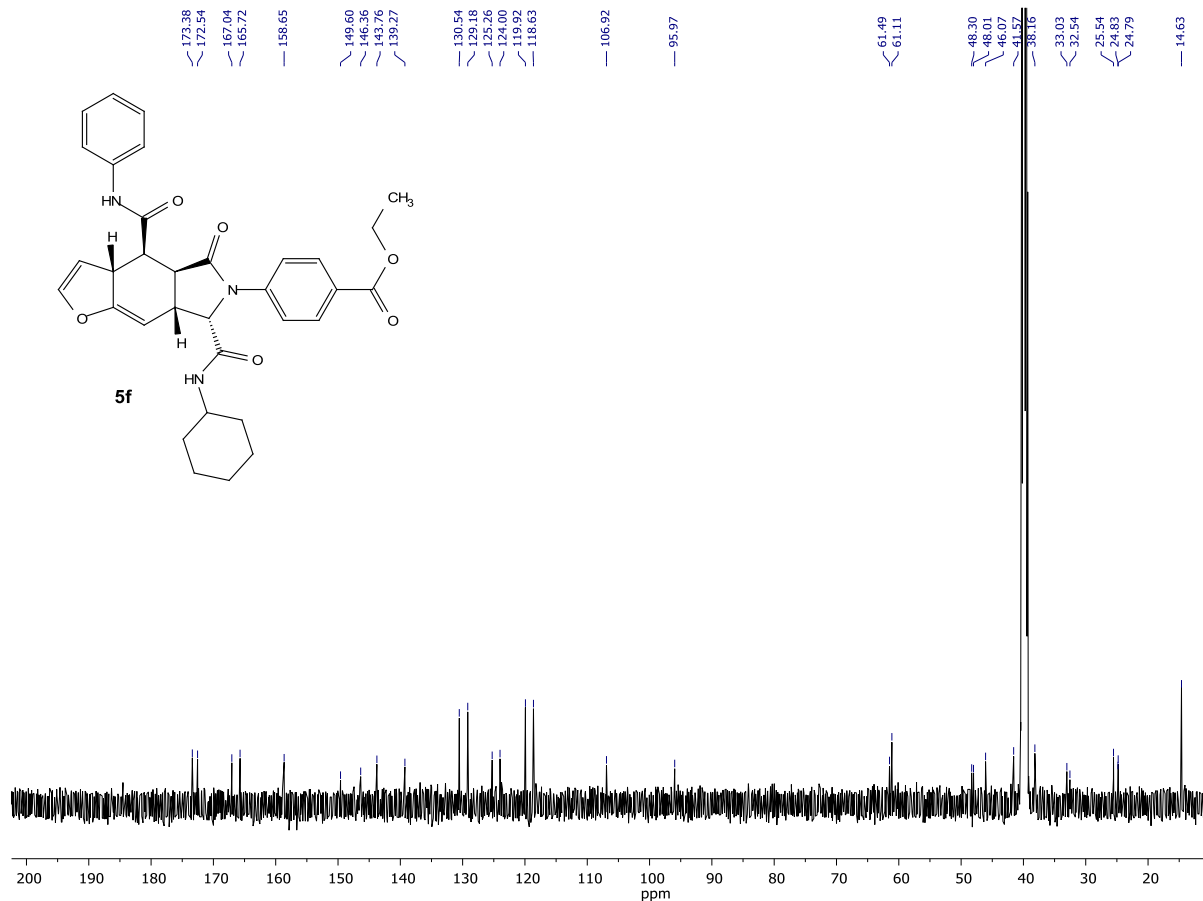





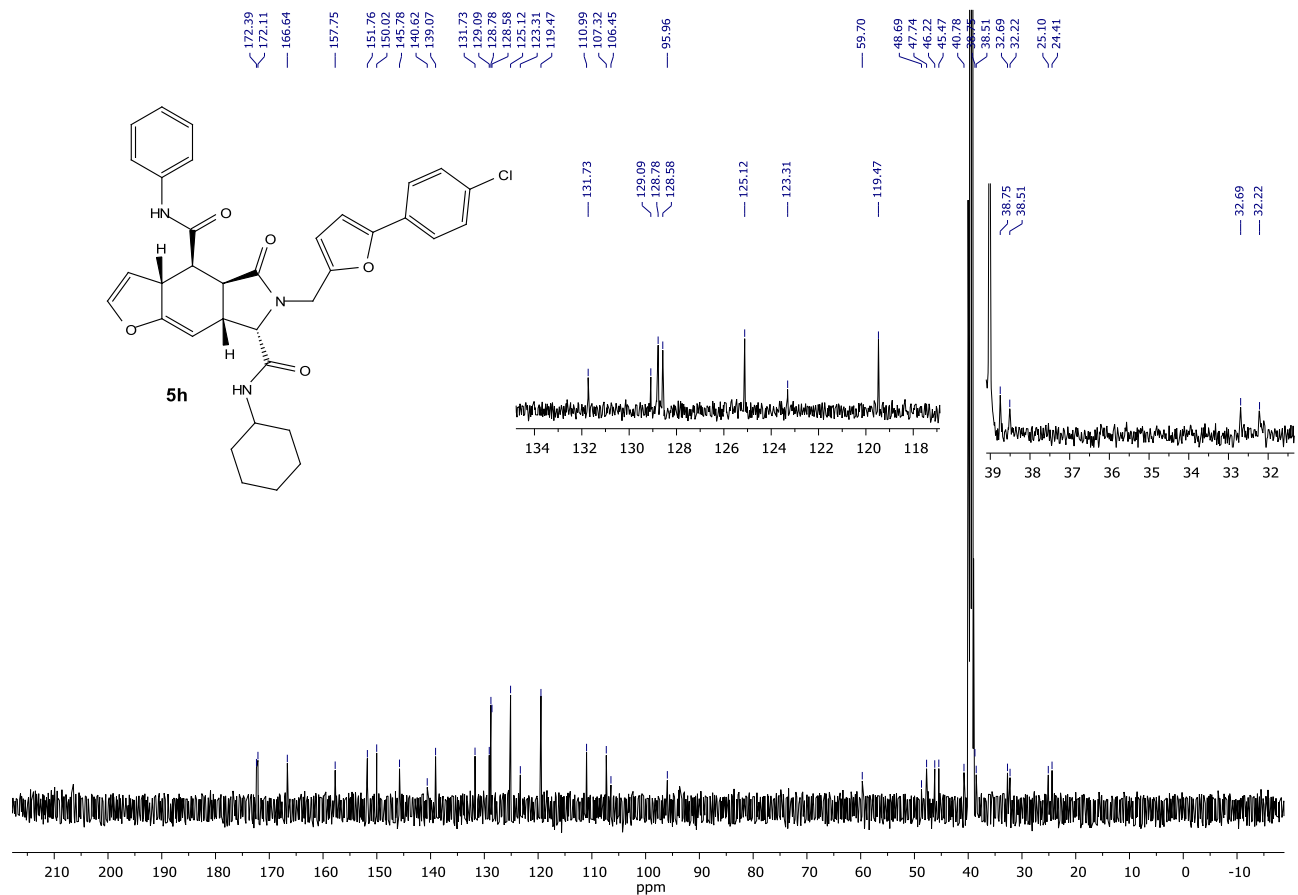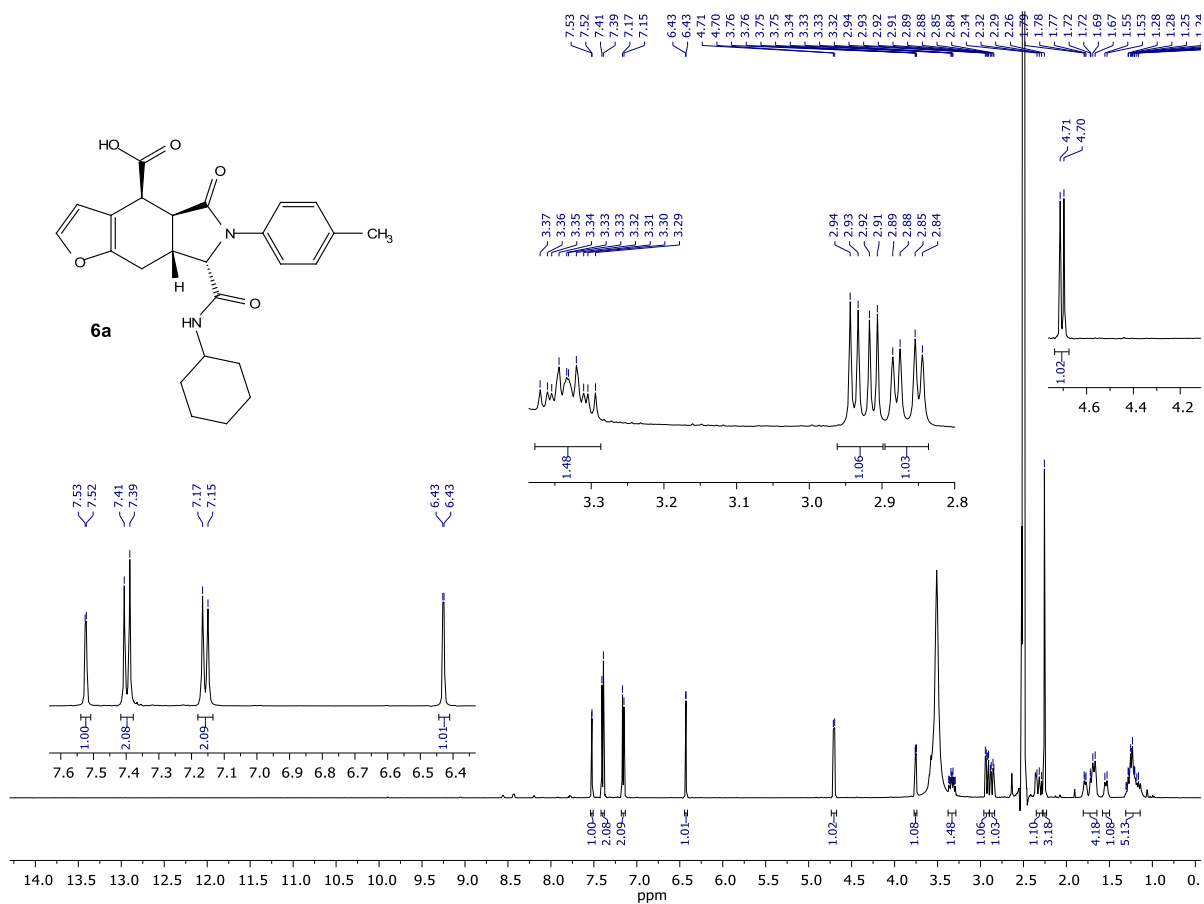

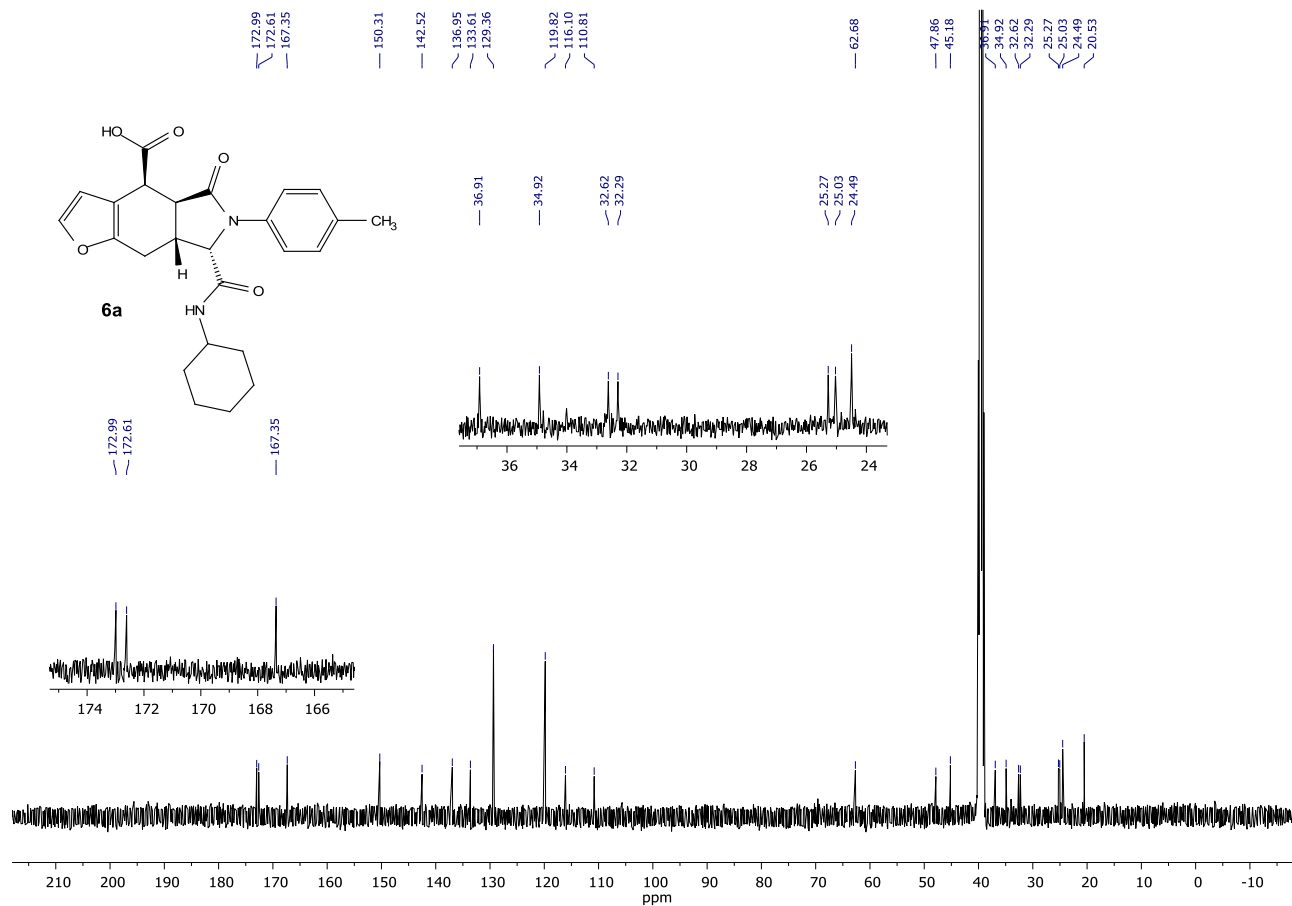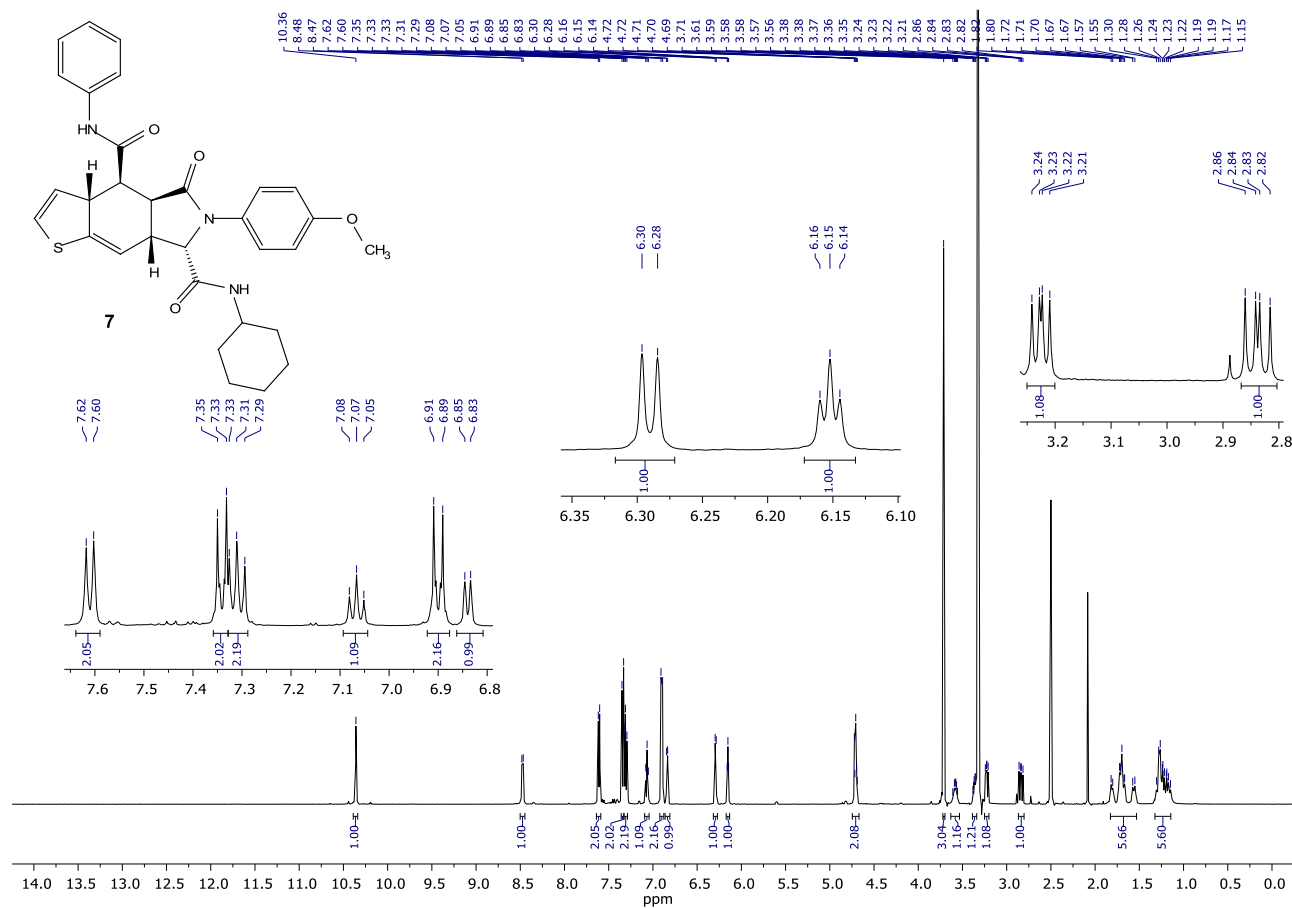



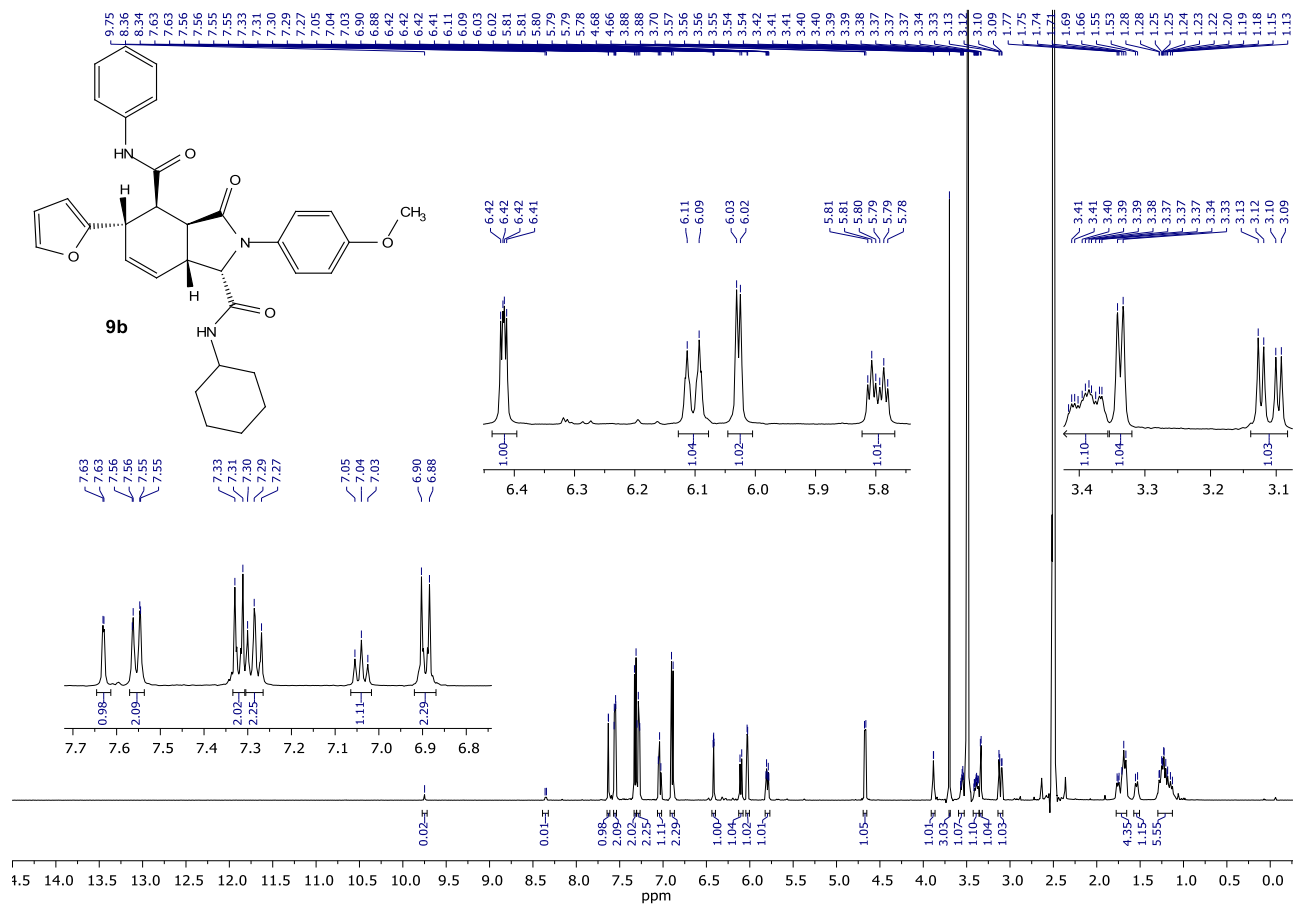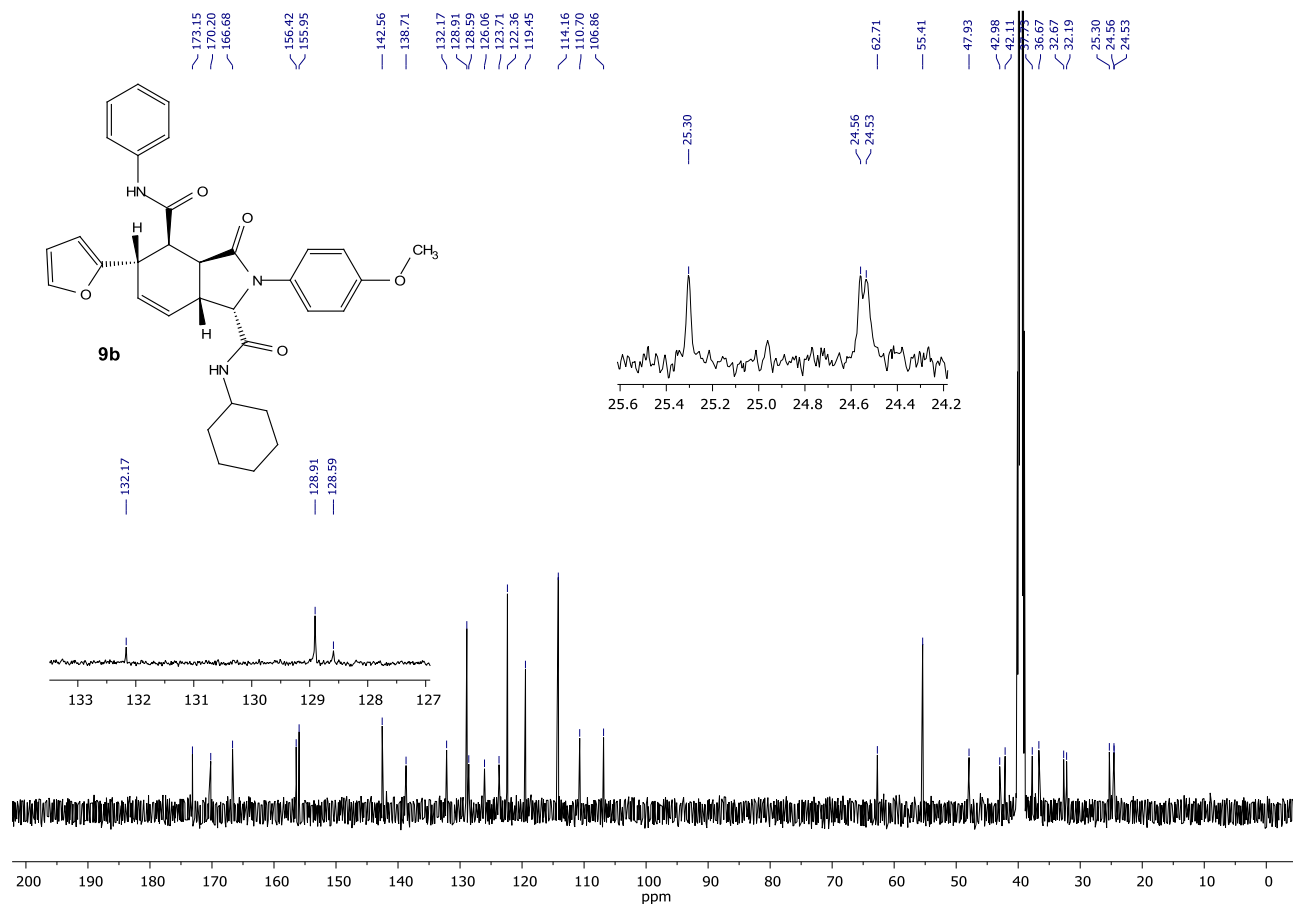

Supplement: Additional file 1 [file 1860-5397-21-31-S1.pdf]
